# Supplementary material for: A novel inlet system for online chemical analysis of semi-volatile submicron particulate matter
Source: Copernicus journal article supplement (doi:10.5194/amt-8-1353-2015), 2015-03-20
Supplement: Supplementary file 1 [file amt-8-1353-2015-supplement.pdf]

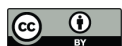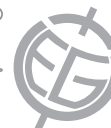

## *Supplement of*

# **A novel inlet system for online chemical analysis of semi-volatile submicron particulate matter**

**P. Eichler et al.**

*Correspondence to:* A. Wisthaler ([armin.wisthaler@uibk.ac.at](mailto:armin.wisthaler@uibk.ac.at))

SUPPLEMENTARY INFORMATION:

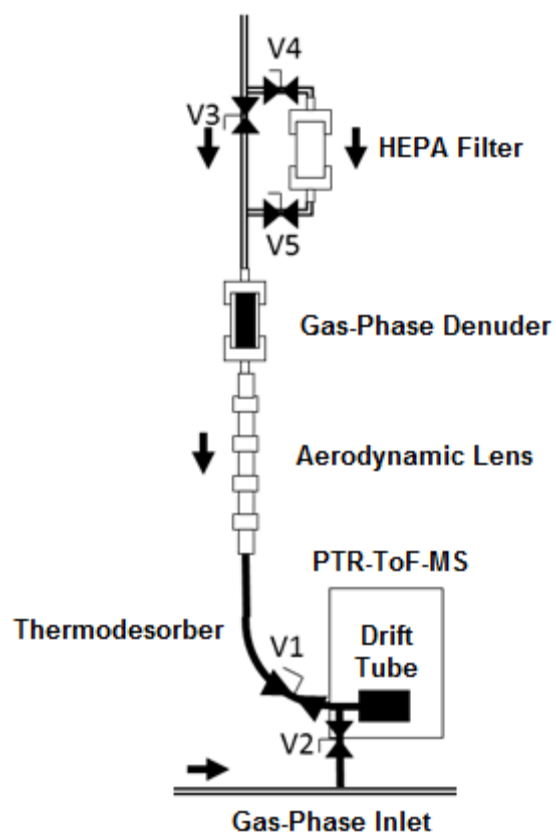

Valve settings:

|                       | V1                                                                    | V2     | V3     | V4     | V5     |
|-----------------------|-----------------------------------------------------------------------|--------|--------|--------|--------|
| particle phase        | open                                                                  | closed | open   | closed | closed |
| particle phase (zero) | open                                                                  | closed | closed | open   | open   |
| gas phase             | closed                                                                | open   | closed | open   | open   |
| gas phase (zero)      | gas phase inlet is overflowed with catalytically cleaned sampling air |        |        |        |        |
